# Supplementary material for: Multidrug-Resistant Salmonella enterica Serovar Rissen Clusters Detected in Azores Archipelago, Portugal
Source: Hindawi journal article supplement (doi:10.1155/2019/1860275), 2019-12-16
Supplement: f1 [file 1860275.f1.pdf]

**Supplementary Table S1A – Metadata, genome assembly statistics, antibiotic resistance phenotype and genotype and heavy metal tolerance genotype of the *Salmonella enterica* serovar Rissen isolates enrolled in the present study.**

| Isolate ID | Lab. ID        | Location      | Region (NUTII)           | Collection Date | Sample        | Source        | Product            | Mean depth of coverage | Genome size (bp) | # of contigs | ST  | Read size (bp) | Sequencing Aparatus | ENA Accession # | ENA ID    |
|------------|----------------|---------------|--------------------------|-----------------|---------------|---------------|--------------------|------------------------|------------------|--------------|-----|----------------|---------------------|-----------------|-----------|
| PT01       | Se_157-14      | Braga         | North                    | July 2014       | Food          | Pig           | Fresh sausages     | 41.14                  | 4907173          | 108          | 469 | 250            | MiSeq               | ERS3404912      | PT_SE0001 |
| PT02       | Se_197-14      | Azores        | Azores                   | August 2014     | Clinical      | Human         | Urine              | 64.84                  | 4905194          | 93           | 469 | 150            | NextSeq 550         | ERS3404913      | PT_SE0002 |
| PT03       | Se_290-14      | Aveiro        | North                    | October 2014    | Clinical      | Human         | Not Available      | 63.47                  | 4914066          | 104          | 469 | 250            | MiSeq               | ERS3404914      | PT_SE0003 |
| PT04       | Se_297-14      | Lisbon        | Lisbon Metropolitan area | November 2014   | Clinical      | Human         | Faeces             | 90.53                  | 4919725          | 112          | 469 | 150            | NextSeq 550         | ERS3404915      | PT_SE0004 |
| PT05       | Se_4-15        | Azores        | Azores                   | January 2015    | Clinical      | Human         | Blood              | 39.5                   | 4937155          | 112          | 469 | 250            | MiSeq               | ERS3404916      | PT_SE0005 |
| PT06       | Se_72-15       | Azores        | Azores                   | February 2015   | Clinical      | Human         | Faeces             | 55.52                  | 4938746          | 76           | 469 | 250            | MiSeq               | ERS3404917      | PT_SE0006 |
| PT07       | Se_90-15       | Azores        | Azores                   | March 2015      | Clinical      | Human         | Faeces             | 53.44                  | 4944290          | 103          | 469 | 250            | MiSeq               | ERS3404918      | PT_SE0007 |
| PT08       | Se_123-15      | Oporto        | North                    | April 2015      | Clinical      | Human         | Faeces             | 90.93                  | 4892381          | 107          | 469 | 150            | NextSeq 550         | ERS3404919      | PT_SE0008 |
| PT09       | Se_128-15      | Oporto        | North                    | April 2015      | Clinical      | Human         | Faeces             | 80.99                  | 4963973          | 112          | 469 | 150            | NextSeq 550         | ERS3404920      | PT_SE0009 |
| PT10       | Se_171-15      | Lisbon        | Lisbon Metropolitan area | June 2015       | Clinical      | Human         | Faeces             | 58.84                  | 4863424          | 161          | 469 | 150            | NextSeq 550         | ERS3404921      | PT_SE0010 |
| PT11       | Se_PIGA-2      | Azores        | Azores                   | June 2015       | Food          | Bovine        | Frozen minced meat | 53.46                  | 4867520          | 74           | 469 | 250            | MiSeq               | ERS3404922      | PT_SE0011 |
| PT12       | Se_PIGA-4      | Not Available | Alentejo                 | June 2015       | Food          | Not Available | Blood chorizo      | 56.62                  | 4975525          | 103          | 469 | 250            | MiSeq               | ERS3404923      | PT_SE0012 |
| PT13       | Se_PIGA-7      | Azores        | Azores                   | June 2015       | Food          | Pig           | Meat chorizo       | 59.02                  | 4944337          | 84           | 469 | 250            | MiSeq               | ERS3404924      | PT_SE0013 |
| PT14       | Se_PIGA-8      | Not Available | Lisbon Metropolitan area | June 2015       | Food          | Pig           | Meat               | 64.89                  | 4945078          | 102          | 469 | 250            | MiSeq               | ERS3404925      | PT_SE0014 |
| PT15       | Se_PIGA-9      | Not Available | Lisbon Metropolitan area | June 2015       | Animal        | Pig           | Piglet             | 75.94                  | 4946168          | 79           | 469 | 250            | MiSeq               | ERS3404926      | PT_SE0015 |
| PT16       | Se_PVRAM-7-15  | Not Available | Not Available            | June 2015       | Animal        | Pig           | Piglet carcass     | 60.58                  | 4995231          | 144          | 469 | 150            | NextSeq 550         | ERS3404927      | PT_SE0016 |
| PT17       | Se_227-15      | Aveiro        | North                    | July 2015       | Clinical      | Human         | Not Available      | 52.81                  | 4843182          | 131          | 469 | 150            | NextSeq 550         | ERS3404928      | PT_SE0017 |
| PT18       | Se_254-15      | Oporto        | North                    | August 2015     | Clinical      | Human         | Faeces             | 48.15                  | 5012266          | 89           | 469 | 250            | MiSeq               | ERS3404929      | PT_SE0018 |
| PT19       | Se_266-15      | Setúbal       | Lisbon Metropolitan area | August 2015     | Clinical      | Human         | Faeces             | 63.42                  | 4886200          | 80           | 469 | 250            | MiSeq               | ERS3404930      | PT_SE0019 |
| PT20       | Se_270-15      | Azores        | Azores                   | August 2015     | Clinical      | Human         | Faeces             | 42.3                   | 4945266          | 97           | 469 | 250            | MiSeq               | ERS3404931      | PT_SE0020 |
| PT21       | Se_305-15      | Coimbra       | Centre                   | August 2015     | Environmental | NA            | Water              | 125.42                 | 5066848          | 125          | 469 | 250            | MiSeq               | ERS3404932      | PT_SE0021 |
| PT22       | Se_479-15      | Oporto        | North                    | November 2015   | Clinical      | Human         | Faeces             | 58.32                  | 4909000          | 109          | 469 | 250            | MiSeq               | ERS3404933      | PT_SE0022 |
| PT23       | Se_PIGA-2-16   | Azores        | Azores                   | November 2015   | Food          | Pig           | Hamburger          | 80.69                  | 4940239          | 84           | 469 | 250            | MiSeq               | ERS3404934      | PT_SE0023 |
| PT24       | Se_PIGA-3-16   | Azores        | Azores                   | November 2015   | Food          | Pig           | Raw Chorizo        | 48.04                  | 4873930          | 94           | 469 | 250            | MiSeq               | ERS3404935      | PT_SE0024 |
| PT25       | Se_PIGA-4-16   | Azores        | Azores                   | November 2015   | Food          | Pig           | Raw meat           | 58.24                  | 4940367          | 98           | 469 | 250            | MiSeq               | ERS3404936      | PT_SE0025 |
| PT26       | Se_PIGA-5-16   | Azores        | Azores                   | January 2016    | Food          | Pig           | Chorizo            | 52.54                  | 4938840          | 85           | 469 | 250            | MiSeq               | ERS3404937      | PT_SE0026 |
| PT27       | Se_R33-16      | Oporto        | North                    | March 2016      | Animal        | Bovine        | Carcass            | 60.86                  | 4924248          | 96           | 469 | 250            | MiSeq               | ERS3404938      | PT_SE0027 |
| PT28       | Se_R39-16      | Azores        | Azores                   | March 2016      | Animal        | Pig           | Carcass            | 55.48                  | 4938922          | 93           | 469 | 250            | MiSeq               | ERS3404939      | PT_SE0028 |
| PT29       | Se_R70-16      | Not Available | Not Available            | May 2016        | Food          | Pig           | Pork skewers       | 56.54                  | 4879946          | 112          | 469 | 150            | NextSeq 550         | ERS3404940      | PT_SE0029 |
| PT30       | Se_R71-16      | Not Available | Not Available            | May 2016        | Food          | Pig           | Pork skewers       | 138.65                 | 4880717          | 91           | 469 | 150            | NextSeq 550         | ERS3404941      | PT_SE0030 |
| PT31       | Se_R72-16      | Not Available | Not Available            | May 2016        | Food          | Pig           | Pork skewers       | 99.05                  | 4889369          | 102          | 469 | 150            | NextSeq 550         | ERS3404942      | PT_SE0031 |
| PT32       | Se_R73-16      | Not Available | Not Available            | May 2016        | Food          | Pig           | Pork skewers       | 68.58                  | 4876907          | 110          | 469 | 150            | NextSeq 550         | ERS3404943      | PT_SE0032 |
| PT33       | Se_R74-16      | Not Available | Not Available            | May 2016        | Food          | Pig           | Pork skewers       | 221.84                 | 4881425          | 87           | 469 | 150            | NextSeq 550         | ERS3404944      | PT_SE0033 |
| PT34       | Se_R92-16      | Not Available | Not Available            | May 2016        | Environmental | NA            | Mud                | 75.75                  | 4917595          | 110          | 469 | 150            | NextSeq 550         | ERS3404945      | PT_SE0034 |
| PT35       | Se_R110-16     | Azores        | Azores                   | June 2016       | Animal        | Pig           | Carcass            | 56.04                  | 4919561          | 123          | 469 | 150            | NextSeq 550         | ERS3404946      | PT_SE0035 |
| PT36       | Se_R134-16     | Setúbal       | Lisbon Metropolitan area | August 2016     | Animal        | Bivalve       | Bivalve mollusc    | 186.4                  | 4910852          | 85           | 469 | 150            | NextSeq 550         | ERS3404947      | PT_SE0036 |
| PT37       | Se_R151-16     | Azores        | Azores                   | August 2016     | Animal        | Pig           | Carcass            | 64.27                  | 4953004          | 147          | 469 | 150            | NextSeq 550         | ERS3404948      | PT_SE0037 |
| PT38       | Se_S176        | Azores        | Azores                   | August 2016     | Clinical      | Human         | Faeces             | 71.69                  | 4937185          | 83           | 469 | 250            | MiSeq               | ERS3404949      | PT_SE0038 |
| PT39       | Se_S208        | Azores        | Azores                   | August 2016     | Clinical      | Human         | Urine              | 57.31                  | 4941276          | 117          | 469 | 250            | MiSeq               | ERS3404950      | PT_SE0039 |
| PT40       | Se_PVRAM-46-16 | Viseu         | Centre                   | October 2016    | Animal        | Chicken       | Carcass            | 68.29                  | 4854659          | 105          | 469 | 150            | NextSeq 550         | ERS3404951      | PT_SE0040 |
| PT41       | Se_S308        | Azores        | Azores                   | October 2016    | Clinical      | Human         | Exudate            | 86.48                  | 4979091          | 118          | 469 | 250            | MiSeq               | ERS3404952      | PT_SE0041 |
| PT42       | Se_R196-16     | Not Available | Not Available            | November 2016   | Food          | Pig           | Raw sausage        | 291.87                 | 4877328          | 89           | 469 | 150            | NextSeq 550         | ERS3404953      | PT_SE0042 |
| PT43       | Se_R199-16     | Azores        | Azores                   | November 2016   | Animal        | Bovine        | Carcass            | 39.49                  | 4947413          | 203          | 469 | 150            | NextSeq 550         | ERS3404954      | PT_SE0043 |
| PT44       | Se_R200-16     | Spain         | Spain                    | November 2016   | Food          | Chicken       | Meat               | 69.09                  | 4888699          | 110          | 469 | 150            | NextSeq 550         | ERS3404955      | PT_SE0044 |
| PT45       | Se_R217-16     | Lisbon        | Lisbon Metropolitan area | December 2016   | Food          | Chicken       | Raw meat           | 63.82                  | 4887212          | 120          | 469 | 150            | NextSeq 550         | ERS3404956      | PT_SE0045 |
| PT46       | Se_PIGA-7-16   | Azores        | Azores                   | January 2016    | Food          | Pig           | Chorizo            | 77.72                  | 4921583          | 108          | 469 | 150            | NextSeq 550         | ERS3404957      | PT_SE0046 |
| PT47       | Se_R65-17      | Not Available | Not Available            | March 2017      | Food          | Turkey        | Turkey skewers     | 83.93                  | 4930828          | 79           | 469 | 150            | NextSeq 550         | ERS3404958      | PT_SE0047 |
| PT48       | Se_S398        | Azores        | Azores                   | March 2017      | Clinical      | Human         | Bronchial aspirate | 62.66                  | 4920188          | 116          | 469 | 250            | MiSeq               | ERS3404959      | PT_SE0048 |
| PT49       | Se_S402        | Azores        | Azores                   | March 2017      | Clinical      | Human         | Urine              | 46.6                   | 4917517          | 100          | 469 | 250            | MiSeq               | ERS3404960      | PT_SE0049 |
| PT50       | Se_S420        | Lisbon        | Lisbon Metropolitan area | March 2017      | Clinical      | Human         | Urine              | 39.09                  | 4903866          | 123          | 469 | 250            | MiSeq               | ERS3404961      | PT_SE0050 |
| PT51       | Se_R74-17      | Azores        | Azores                   | April 2017      | Animal        | Bovine        | Carcass            | 77.31                  | 4963946          | 117          | 469 | 150            | NextSeq 550         | ERS3404962      | PT_SE0051 |
| PT52       | Se_S473        | Azores        | Azores                   | May 2017        | Clinical      | Human         | Faeces             | 46.96                  | 4939749          | 93           | 469 | 250            | MiSeq               | ERS3404963      | PT_SE0052 |
| PT53       | Se_PVRAM-2-17  | Leiria        | Centre                   | June 2017       | Animal        | Bovine        | Carcass            | 59.02                  | 4925286          | 115          | 469 | 150            | NextSeq 550         | ERS3404964      | PT_SE0053 |
| PT54       | Se_PVRAM-3-17  | Azores        | Azores                   | July 2017       | Animal        | Pig           | Carcass            | 46.47                  | 4936820          | 229          | 469 | 150            | NextSeq 550         | ERS3404965      | PT_SE0054 |
| PT55       | Se_PVRAM-10-17 | Azores        | Azores                   | August 2017     | Animal        | Pig           | Carcass            | 127.85                 | 4961638          | 130          | 469 | 150            | NextSeq 550         | ERS3404966      | PT_SE0055 |
| PT56       | Se_PVRAM-17-17 | Leiria        | Centre                   | August 2017     | Animal        | Pig           | Carcass            | 49.42                  | 4913428          | 123          | 469 | 150            | NextSeq 550         | ERS3404967      | PT_SE0056 |
| PT57       | Se_PIGA-8-17   | Not Available | Centre                   | September 2017  | Food          | Pig           | Chorizo            | 49.41                  | 4909916          | 176          | 469 | 150            | NextSeq 550         | ERS3404968      | PT_SE0057 |
| PT58       | Se_PVRAM-19-17 | Leiria        | Centre                   | September 2017  | Animal        | Pig           | Carcass            | 63.03                  | 4917601          | 123          | 469 | 150            | NextSeq 550         | ERS3404969      | PT_SE0058 |
| PT59       | Se_S674        | Lisbon        | Lisbon Metropolitan area | September 2017  | Clinical      | Human         | Pus                | 44.34                  | 4924957          | 182          | 469 | 150            | NextSeq 550         | ERS3404970      | PT_SE0059 |
| PT60       | Se_R258-17     | Not Available | Not Available            | October 2017    | Food          | Bovine/pork   | Gourmet Hamburguer | 65.2                   | 5090350          | 122          | 469 | 150            | NextSeq 550         | ERS3404971      | PT_SE0060 |

NUT - Nomenclature of Territorial Units for Statistics.



**Supplementary Table S2** - List of publicly available *Salmonella enterica* serovar Rissen genomes used in the present study. All read datasets were downloaded from the European Nucleotide Archive.

| Strain ID         | Sample source | Year | Location           | ENA Accession # |
|-------------------|---------------|------|--------------------|-----------------|
| BCW_2764          | Human         | 2002 | Denmark            | SAMN02368641    |
| CRJJGF_00114      | Food          | 2004 | United States      | SAMN02908621    |
| BCW_2766          | Unknown       | 2004 | Thailand           | SAMN02368643    |
| BCW_2765          | Livestock     | 2004 | Denmark            | SAMN02368642    |
| FDA00001049       | Environment   | 2006 | Turkey             | SAMN02844434    |
| FDA00001046       | Environment   | 2006 | Vietnam            | SAMN02844431    |
| FDA00004496       | Animal feed   | 2008 | United States      | SAMN02918550    |
| IEH_NGS_SAL_00172 | Environment   | 2009 | United States      | SAMN02265259    |
| FDA00002917       | Environment   | 2009 | United States      | SAMN02846301    |
| FDA00002912       | Environment   | 2009 | United States      | SAMN02846296    |
| FDA00002855       | Food          | 2009 | United States      | SAMN02846239    |
| FDA00002853       | Environment   | 2009 | United States      | SAMN02846237    |
| FDA00002914       | Environment   | 2009 | United States      | SAMN02846298    |
| FDA00002915       | Environment   | 2009 | United States      | SAMN02846299    |
| FDA00002913       | Environment   | 2009 | United States      | SAMN02846297    |
| FDA00002854       | Food          | 2009 | United States      | SAMN02846238    |
| FDA00002916       | Environment   | 2009 | United States      | SAMN02846300    |
| FDA00002850       | Environment   | 2009 | United States      | SAMN02846234    |
| FDA00002849       | Environment   | 2009 | United States      | SAMN02846233    |
| FDA00002481       | Environment   | 2009 | United States      | SAMN02845865    |
| FDA00002848       | Environment   | 2009 | United States      | SAMN02846232    |
| FDA00002852       | Environment   | 2009 | United States      | SAMN02846236    |
| FDA00002851       | Environment   | 2009 | United States      | SAMN02846235    |
| FDA00002939       | Food          | 2009 | United States      | SAMN02846323    |
| FDA00002788       | Food          | 2009 | United States      | SAMN02846172    |
| FDA00002938       | Food          | 2009 | United States      | SAMN02846322    |
| CFSAN031935       | Environment   | 2009 | United States      | SAMN03577468    |
| CFSAN031930       | Environment   | 2009 | United States      | SAMN03577463    |
| CFSAN031937       | Environment   | 2009 | United States      | SAMN03577470    |
| 32309.31          | Environment   | 2009 | United States      | SAMN10253329    |
| FDA00003115       | Environment   | 2010 | United States      | SAMN02846535    |
| FDA00003545       | Aquatic       | 2010 | Vietnam            | SAMN02846965    |
| FDA00003544       | Aquatic       | 2010 | Vietnam            | SAMN02846964    |
| FNW19G96          | Aquatic       | 2010 | Vietnam            | SAMN02344903    |
| FDA00004662       | Food          | 2010 | United States      | SAMN02918711    |
| FDA00001453       | Environment   | 2010 | Dominican Republic | SAMN02844838    |
| NC_S803           | Livestock     | 2010 | United States      | SAMN07469595    |
| NC_S812           | Livestock     | 2010 | United States      | SAMN07469592    |
| NC_S810           | Livestock     | 2010 | United States      | SAMN07469594    |
| NC_S811           | Livestock     | 2010 | United States      | SAMN07469593    |
| NC_S801           | Livestock     | 2010 | United States      | SAMN07469597    |
| NC_S802           | Livestock     | 2010 | United States      | SAMN07469596    |
| FAR0094           | Food          | 2011 | China              | SAMN02345345    |
| FSE0050           | Food          | 2011 | Vietnam            | SAMN02345332    |
| FSW0031           | Environment   | 2011 | Philippines        | SAMN02345262    |
| CFSAN030098       | Food          | 2012 | United States      | SAMN03464584    |
| H124020495        | Food          | 2012 | United Kingdom     | SAMN03168707    |
| H125180332        | Food          | 2012 | United Kingdom     | SAMN03168603    |
| FAR0091           | Food          | 2012 | Unknown            | SAMN02345586    |

| Strain ID    | Sample source | Year | Location       | ENA Accession # |
|--------------|---------------|------|----------------|-----------------|
| FAR0099      | Environment   | 2012 | Mexico         | SAMN02345539    |
| PNUSAS002751 | Unknown       | 2012 | United States  | SAMN06198443    |
| CFSAN031334  | Livestock     | 2013 | Thailand       | SAMN03576868    |
| CFSAN031330  | Livestock     | 2013 | Thailand       | SAMN03576864    |
| CFSAN031335  | Livestock     | 2013 | Thailand       | SAMN03576869    |
| CFSAN031332  | Livestock     | 2013 | Thailand       | SAMN03576866    |
| CFSAN031331  | Livestock     | 2013 | Thailand       | SAMN03576865    |
| CFSAN031321  | Livestock     | 2013 | Thailand       | SAMN03576855    |
| CFSAN031320  | Livestock     | 2013 | Thailand       | SAMN03576854    |
| CFSAN031313  | Livestock     | 2013 | Thailand       | SAMN03576847    |
| CFSAN031314  | Livestock     | 2013 | Thailand       | SAMN03576848    |
| CFSAN031318  | Livestock     | 2013 | Thailand       | SAMN03576852    |
| CFSAN031312  | Livestock     | 2013 | Thailand       | SAMN03576846    |
| CFSAN031308  | Livestock     | 2013 | Thailand       | SAMN03576842    |
| CFSAN031315  | Livestock     | 2013 | Thailand       | SAMN03576849    |
| CFSAN031324  | Livestock     | 2013 | Thailand       | SAMN03576858    |
| CFSAN031309  | Livestock     | 2013 | Thailand       | SAMN03576843    |
| CFSAN031327  | Livestock     | 2013 | Thailand       | SAMN03576861    |
| CFSAN031325  | Livestock     | 2013 | Thailand       | SAMN03576859    |
| CFSAN031322  | Livestock     | 2013 | Thailand       | SAMN03576856    |
| CFSAN031316  | Livestock     | 2013 | Thailand       | SAMN03576850    |
| CFSAN031323  | Livestock     | 2013 | Thailand       | SAMN03576857    |
| CFSAN031311  | Livestock     | 2013 | Thailand       | SAMN03576845    |
| CFSAN031310  | Livestock     | 2013 | Thailand       | SAMN03576844    |
| CFSAN031319  | Livestock     | 2013 | Thailand       | SAMN03576853    |
| CFSAN031307  | Livestock     | 2013 | Thailand       | SAMN03576841    |
| CFSAN031306  | Livestock     | 2013 | Thailand       | SAMN03576840    |
| FNE0189      | Food          | 2013 | Thailand       | SAMN02698353    |
| CFSAN045275  | Livestock     | 2013 | Thailand       | SAMN04431411    |
| CFSAN045273  | Livestock     | 2013 | Thailand       | SAMN04431409    |
| CFSAN045268  | Livestock     | 2013 | Thailand       | SAMN04431404    |
| CFSAN045265  | Livestock     | 2013 | Thailand       | SAMN04431401    |
| CFSAN045263  | Livestock     | 2013 | Thailand       | SAMN04431399    |
| CFSAN045340  | Livestock     | 2013 | Thailand       | SAMN04431476    |
| CFSAN045327  | Livestock     | 2013 | Thailand       | SAMN04431463    |
| CFSAN045326  | Livestock     | 2013 | Thailand       | SAMN04431462    |
| CFSAN045324  | Livestock     | 2013 | Thailand       | SAMN04431460    |
| OH-1302304   | Unknown       | 2013 | United States  | SAMN05721584    |
| CVM N44364F  | Livestock     | 2013 | United States  | SAMN06287508    |
| CFSAN084068  | Environment   | 2013 | United States  | SAMN09756362    |
| S280         | Unknown       | 2014 | Portugal       | SAMEA3476860    |
| 73107        | Human         | 2014 | United Kingdom | SAMN03479841    |
| 5965         | Human         | 2014 | United Kingdom | SAMN03479663    |
| 40781        | Food          | 2014 | United Kingdom | SAMN03478634    |
| 68669        | ND            | 2014 | United Kingdom | SAMN03477972    |
| 31626        | Human         | 2014 | United Kingdom | SAMN03476772    |
| 5839         | Human         | 2014 | United Kingdom | SAMN03476472    |
| 13420        | Human         | 2014 | United Kingdom | SAMN03473985    |
| CFSAN045347  | Livestock     | 2014 | Thailand       | SAMN04431483    |
| CFSAN045343  | Livestock     | 2014 | Thailand       | SAMN04431479    |
| CVM N57959F  | Unknown       | 2014 | United States  | SAMN04577502    |

| Strain ID              | Sample source  | Year | Location       | ENA Accession # |
|------------------------|----------------|------|----------------|-----------------|
| CVM N57219F            | Livestock      | 2014 | United States  | SAMN04577270    |
| NC_NCF3D0-L5           | Environment    | 2014 | United States  | SAMN06322129    |
| FDA00008934            | Food           | 2015 | Mexico         | SAMN03495909    |
| FDA00008935            | Food           | 2015 | Mexico         | SAMN03495910    |
| 91210                  | Food           | 2015 | United Kingdom | SAMN03480405    |
| 91281                  | Human          | 2015 | United Kingdom | SAMN03480200    |
| 91246                  | Human          | 2015 | United Kingdom | SAMN03480194    |
| 91209                  | Food           | 2015 | United Kingdom | SAMN03479124    |
| 91211                  | Food           | 2015 | United Kingdom | SAMN03478922    |
| 91208                  | Food           | 2015 | United Kingdom | SAMN03478809    |
| 91212                  | Food           | 2015 | United Kingdom | SAMN03476328    |
| FDA00009504            | Aquatic animal | 2015 | Vietnam        | SAMN04148250    |
| FSIS1502596            | Livestock      | 2015 | United States  | SAMN04331735    |
| FSIS1503283            | Livestock      | 2015 | United States  | SAMN04331725    |
| ADRD1-15-8159          | Poultry        | 2015 | United States  | SAMN04240670    |
| FSIS1605466            | Livestock      | 2015 | United States  | SAMN04530405    |
| CVM N57971             | Poultry        | 2015 | United States  | SAMN04576648    |
| 182090                 | Human          | 2015 | United Kingdom | SAMN04600580    |
| 185971                 | Human          | 2015 | United Kingdom | SAMN04600398    |
| 129524                 | Human          | 2015 | United Kingdom | SAMN04600236    |
| CVM N57978             | Poultry        | 2015 | United States  | SAMN05771731    |
| MS150107               | Human          | 2015 | Ireland        | SAMEA81466918   |
| NC_NCF6D0-A13          | Environment    | 2015 | United States  | SAMN06322119    |
| NC_NCF6D0-A18          | Environment    | 2015 | United States  | SAMN06322118    |
| NC_NCF6D0-A4           | Environment    | 2015 | United States  | SAMN06322126    |
| NC_NCF6D0-L9           | Environment    | 2015 | United States  | SAMN06322127    |
| NC_NCF6D0-L8           | Environment    | 2015 | United States  | SAMN06322128    |
| NC_NCF6D0-A20          | Environment    | 2015 | United States  | SAMN06322116    |
| 151916                 | Livestock      | 2015 | Spain          | SAMEA104142963  |
| PAT-15-27861SA         | Livestock      | 2015 | Portugal       | SAMEA104142939  |
| PAT-15-19702SA         | Livestock      | 2015 | Portugal       | SAMEA104142937  |
| 15Q003557              | Livestock      | 2015 | France         | SAMEA104142871  |
| ADRD1-15-2378          | Livestock      | 2015 | United States  | SAMN07351348    |
| CFSAN069222            | Environment    | 2015 | United States  | SAMN07714159    |
| 2187_Se_151916         | Livestock      | 2015 | Spain          | SAMEA104354224  |
| 2176_Se_PAT_15_27861SA | Livestock      | 2015 | Portugal       | SAMEA104354222  |
| 2174_Se_PAT_15_19702SA | Livestock      | 2015 | Portugal       | SAMEA104354221  |
| 34927                  | Livestock      | 2015 | United States  | SAMN07420494    |
| 170460                 | Human          | 2015 | United Kingdom | SAMN09423139    |
| FDA00009757            | Food           | 2015 | Jamaica        | SAMN04385807    |
| FDA00009756            | Food           | 2015 | Jamaica        | SAMN04385806    |
| 191884                 | Human          | 2015 | United Kingdom | SAMN09484447    |
| 195784                 | Human          | 2015 | United Kingdom | SAMN10140147    |
| FDA00010268            | Food           | 2016 | Unresolved     | SAMN05232953    |
| FDA00010267            | Environment    | 2016 | Unresolved     | SAMN05232952    |
| PNUSAS004417           | Unknown        | 2016 | United States  | SAMN05877103    |
| ADRD1-16-9998          | Livestock      | 2016 | United States  | SAMN05781501    |
| FSIS1608386            | Livestock      | 2016 | United States  | SAMN06048830    |
| CFSAN058818            | Environment    | 2016 | United States  | SAMN06175263    |
| CFSAN058816            | Environment    | 2016 | United States  | SAMN06175307    |
| FSIS1609588            | Livestock      | 2016 | United States  | SAMN06229944    |

| Strain ID      | Sample source  | Year | Location       | ENA Accession # |
|----------------|----------------|------|----------------|-----------------|
| FDA00011195    | Animal feed    | 2016 | United States  | SAMN06214692    |
| FDA00011193    | Animal feed    | 2016 | United States  | SAMN06214694    |
| 271097         | Human          | 2016 | United Kingdom | SAMN06278620    |
| CFSAN059804    | Environment    | 2016 | United States  | SAMN06270186    |
| ADRD-902       | Livestock      | 2016 | United States  | SAMN06330644    |
| OH-16-23867-16 | Poultry        | 2016 | United States  | SAMN07138205    |
| OH-16-26883-1  | Poultry        | 2016 | United States  | SAMN07184770    |
| CFSAN071463    | Environment    | 2016 | United States  | SAMN08017022    |
| CVM N16S193    | Poultry        | 2016 | United States  | SAMN08114066    |
| CVM N16S274    | Poultry        | 2016 | United States  | SAMN08114143    |
| CFSAN075243    | Feed           | 2016 | United States  | SAMN08395358    |
| CFSAN071961    | Environment    | 2016 | United States  | SAMN08057881    |
| CFSAN080464    | Feed           | 2016 | United States  | SAMN09071683    |
| 227073         | Human          | 2016 | United Kingdom | SAMN09403226    |
| 216348         | Human          | 2016 | United Kingdom | SAMN09403232    |
| 217006         | Human          | 2016 | United Kingdom | SAMN09610602    |
| 212747         | Food           | 2016 | United Kingdom | SAMN09634347    |
| FSIS1710520    | Poultry        | 2017 | United States  | SAMN06459939    |
| FSIS1710555    | Livestock      | 2017 | United States  | SAMN06459285    |
| FSIS1700028    | Livestock      | 2017 | United States  | SAMN06701838    |
| FDA00011518    | Food           | 2017 | Mexico         | SAMN06689639    |
| FSIS1700448    | Livestock      | 2017 | United States  | SAMN06882344    |
| FSIS1700956    | Livestock      | 2017 | United States  | SAMN06899446    |
| FSIS1701130    | Livestock      | 2017 | United States  | SAMN07141738    |
| 367310         | Human          | 2017 | United Kingdom | SAMN07155624    |
| 360374         | Human          | 2017 | United Kingdom | SAMN07155217    |
| 367265         | Human          | 2017 | United Kingdom | SAMN07180765    |
| 333422         | Food           | 2017 | United Kingdom | SAMN07180676    |
| 333421         | Food           | 2017 | United Kingdom | SAMN07180660    |
| 362108         | Human          | 2017 | United Kingdom | SAMN07180311    |
| 363492         | Human          | 2017 | United Kingdom | SAMN07180216    |
| FSIS1701469    | Livestock      | 2017 | United States  | SAMN07237724    |
| FSIS1702121    | Livestock      | 2017 | United States  | SAMN07260890    |
| FSIS1703115    | Livestock      | 2017 | United States  | SAMN07424747    |
| FSIS1703367    | Livestock      | 2017 | United States  | SAMN07501501    |
| FSIS1703368    | Livestock      | 2017 | United States  | SAMN07501502    |
| FDA00012093    | Animal feed    | 2017 | Argentina      | SAMN07510071    |
| PNUSAS021809   | Unknown        | 2017 | United States  | SAMN07561485    |
| FSIS21720373   | Livestock      | 2017 | United States  | SAMN07819022    |
| FSIS11704588   | Livestock      | 2017 | United States  | SAMN07835489    |
| FDA00012295    | Aquatic animal | 2017 | Vietnam        | SAMN07981379    |
| FSIS11705536   | Livestock      | 2017 | United States  | SAMN08114352    |
| CFSAN071971    | Environment    | 2017 | United States  | SAMN08057833    |
| CFSAN071970    | Environment    | 2017 | United States  | SAMN08057822    |
| FSIS1701253    | Livestock      | 2017 | United States  | SAMN09098834    |
| 412138         | Human          | 2017 | United Kingdom | SAMN09298461    |
| CFSAN081790    | Feed           | 2017 | United States  | SAMN09262024    |
| 456191         | Human          | 2017 | United Kingdom | SAMN09388861    |
| 371818         | Human          | 2017 | United Kingdom | SAMN09423133    |
| 388672         | Human          | 2017 | United Kingdom | SAMN09431486    |
| 445933         | Human          | 2017 | United Kingdom | SAMN09445526    |

| Strain ID           | Sample source | Year    | Location       | ENA Accession # |
|---------------------|---------------|---------|----------------|-----------------|
| 378690              | Food          | 2017    | United Kingdom | SAMN09643791    |
| CVM N17S1456        | Livestock     | 2017    | United States  | SAMN09771059    |
| 413029              | Human         | 2017    | United Kingdom | SAMN09433805    |
| PNUSAS032562        | Environment   | 2018    | United States  | SAMN08383811    |
| FSIS31800061        | Livestock     | 2018    | United States  | SAMN08432325    |
| ADRD-1843           | Livestock     | 2018    | United States  | SAMN08579906    |
| FSIS11808313        | Livestock     | 2018    | United States  | SAMN08767328    |
| FSIS21821362        | Poultry       | 2018    | United States  | SAMN08848643    |
| FSIS11808806        | Livestock     | 2018    | United States  | SAMN08886742    |
| FSIS11809218        | Livestock     | 2018    | United States  | SAMN08967083    |
| 529250              | Human         | 2018    | United Kingdom | SAMN09076426    |
| FSIS21821653        | Poultry       | 2018    | United States  | SAMN09225336    |
| 520599              | Human         | 2018    | United Kingdom | SAMN09388937    |
| FSIS11810650        | Livestock     | 2018    | United States  | SAMN09444133    |
| 533995              | Human         | 2018    | United Kingdom | SAMN09522091    |
| sam                 | Human         | 2018    | Ireland        | SAMEA4730812    |
| 550127              | Human         | 2018    | United Kingdom | SAMN09607167    |
| 503417              | Human         | 2018    | United Kingdom | SAMN09634155    |
| 526142              | Human         | 2018    | United Kingdom | SAMN09651916    |
| FSIS11811376        | Livestock     | 2018    | United States  | SAMN09633410    |
| 570850              | Human         | 2018    | United Kingdom | SAMN09683619    |
| FSIS11810870        | Poultry       | 2018    | United States  | SAMN09533147    |
| FSIS31800980        | Poultry       | 2018    | United States  | SAMN09994491    |
| FSIS11813906        | Livestock     | 2018    | United States  | SAMN10064108    |
| FSIS11808310        | Livestock     | 2018    | United States  | SAMN08767326    |
| 06-1346             | Unknown       | Unknown | Unknown        | SAMEA1484347    |
| PNUSAS001935        | Unknown       | Unknown | United States  | SAMN04893774    |
| VNB1121-sc-2280660  | Unknown       | Unknown | Unknown        | SAMEA3447772    |
| 2452-sc-2280574     | Unknown       | Unknown | Unknown        | SAMEA3447686    |
| 74_H_097-sc-2280751 | Unknown       | Unknown | Unknown        | SAMEA3447861    |
| 72_H_175-sc-2280732 | Unknown       | Unknown | Unknown        | SAMEA3447843    |
| 71_H_195-sc-2280689 | Unknown       | Unknown | Unknown        | SAMEA3447801    |
| 71_H_131-sc-2280683 | Unknown       | Unknown | Unknown        | SAMEA3447795    |
| VNSC2361-sc-2280610 | Unknown       | Unknown | Unknown        | SAMEA3447722    |
| VNB1504-sc-2280704  | Unknown       | Unknown | Unknown        | SAMEA3447816    |
| 01-0479             | Unknown       | Unknown | Unknown        | SAMN03264955    |
| 00-0084             | Unknown       | Unknown | Unknown        | SAMN03264954    |
| 2012K-0157          | Unknown       | Unknown | Unknown        | SAMN03264953    |
| BCW_2864            | Unknown       | Unknown | Unknown        | SAMN02368730    |
| PNUSAS002711        | Unknown       | Unknown | United States  | SAMN05603672    |
| PNUSAS004670        | Unknown       | Unknown | United States  | SAMN05919885    |
| S02948-14           | Unknown       | Unknown | Unknown        | SAMEA4064117    |
| S02707-14           | Unknown       | Unknown | Unknown        | SAMEA4064114    |
| PNUSAS006373        | Unknown       | Unknown | United States  | SAMN06213966    |
| SAMEA4412641        | Unknown       | Unknown | Unknown        | SAMEA4412641    |
| PNUSAS007242        | Unknown       | Unknown | United States  | SAMN06220355    |
| PNUSAS007916        | Unknown       | Unknown | United States  | SAMN06310818    |
| PNUSAS009904        | Unknown       | Unknown | United States  | SAMN06625047    |
| PNUSAS014086        | Unknown       | Unknown | United States  | SAMN07161029    |
| PNUSAS023317        | Unknown       | Unknown | United States  | SAMN07806985    |
| PNUSAS025277        | Unknown       | Unknown | United States  | SAMN07949738    |

| Strain ID     | Sample source | Year    | Location      | ENA Accession # |
|---------------|---------------|---------|---------------|-----------------|
| PNUSAS027824  | Unknown       | Unknown | United States | SAMN08016445    |
| PNUSAS030901  | Unknown       | Unknown | United States | SAMN08240237    |
| PNUSAS032846  | Unknown       | Unknown | United States | SAMN08432357    |
| PNUSAS029879  | Unknown       | Unknown | United States | SAMN08470840    |
| PNUSAS035109  | Unknown       | Unknown | United States | SAMN08616364    |
| PNUSAS036743  | Unknown       | Unknown | United States | SAMN08823502    |
| PNUSAS037800  | Unknown       | Unknown | United States | SAMN08865617    |
| PNUSAS037136  | Unknown       | Unknown | United States | SAMN08865508    |
| PNUSAS037130  | Unknown       | Unknown | United States | SAMN08865514    |
| PNUSAS037097  | Unknown       | Unknown | United States | SAMN08922760    |
| PNUSAS042247  | Unknown       | Unknown | United States | SAMN09381922    |
| PNUSAS042313  | Unknown       | Unknown | United States | SAMN09501102    |
| PNUSAS043909  | Unknown       | Unknown | United States | SAMN09534158    |
| PNUSAS044558  | Unknown       | Unknown | United States | SAMN09636247    |
| PNUSAS045202  | Unknown       | Unknown | United States | SAMN09650791    |
| 14ARS_VSM0382 | Unknown       | Unknown | Unknown       | SAMEA104162236  |
| 14ARS_VSM0381 | Unknown       | Unknown | Unknown       | SAMEA104162235  |
